# Supplementary material for: Investigating the influence of substituent groups in TTM based radicals for the excitation process: a theoretical study
Source: Royal Society of Chemistry journal article supplement (doi:10.1039/d3cp01248d), 2023-01-01
Supplement: d3cp01248d1.pdf [file d3cp01248d1.pdf]

# Supporting Information for Investigating the influence of substituent groups in TTM based radicals to the excitation process: A theoretical study.

Lu-ran Fei, Jian Wang, Fu-quan Bai, Shi-ping Wang, Bin Hu, Chui-peng Kong\* and  
Hong-xing Zhang\*

Laboratory of Theoretical and Computational Chemistry, Institute of Theoretical  
Chemistry, College of Chemistry, Jilin University, 130023 Changchun, PR China

This file includes:

1. Table S1a, S1b and S1c: Comparison of different functional; The emissive bands and adsorption bands for radicals in different solvents.
2. Figure S1 and table S2: The characteristic bonds and dihedrals for TTM based radicals in cyclohexane solvent.
3. Figure S2: The calculated molecular orbitals of the radicals in the ground state.
4. Figure S3 the hole-electron overlap for the selected radicals. The overlap is directly related to the value of transition dipole moment.
5. Table S3 parameters in (1) and (2) for obtaining  $H_{ab}$ . Dipole moments (in Debye) and  $\Delta E_{12}$  (in a.u.)
6. Table S4 The calculated  $k_r$  and  $k_{nr}$  ( $10^7 \text{ S}^{-1}$ ) of TTM based radicals in toluene.
7. Table S4: Considering Huang-Rhys factors (S) of each radical in cyclohexane contributed from different vibrational modes. Where B represents bond length; A represents bond angle; D represents the dihedral.
8. Atomic coordinates of all the radicals at their ground-state geometry.

---

\* Corresponding author. E-mail: kongerer@jlu.edu.cn

\* Corresponding author. E-mail: zhanghx@jlu.edu.cn

1. Table S1a The calculated emissive bands of TTM and TTM PCz radicals with different kinds of functional in cyclohexane solvent.

| Radicals | b3lyp | cam-b3lyp | wb97xd | m062x | Exp. |
|----------|-------|-----------|--------|-------|------|
| TTM      | 557   | 500       | 498    | 542   | 570  |
| TTM-PCz  | 738   | 583       | 569    | 634   | 703  |

Table S1b The calculated emissive bands of radicals in different solvents.

| Radicals     | cyclohexane | toluene | chloroform |
|--------------|-------------|---------|------------|
| TTM          | 557         | 558     | 559        |
| TTM-IMz      | 751         | 759     | 787        |
| TTM-PCz      | 784         | 783     | 785        |
| TTM-3PCz     | 738         | 745     | 768        |
| TTM-3NCz     | 748         | 755     | 778        |
| 2Br-TTM-3PCz | 739         | 746     | 769        |
| 2F-TTM-3PCz  | 690         | 696     | 717        |

Table S1c The calculated adsorption bands of radicals in different solvents.

| Radicals     | cyclohexane | toluene | chloroform |
|--------------|-------------|---------|------------|
| TTM          | 468         | 468     | 506        |
| TTM-IMz      | 602         | 609     | 629        |
| TTM-PCz      | 675         | 676     | 677        |
| TTM-3PCz     | 651         | 657     | 671        |
| TTM-3NCz     | 658         | 662     | 676        |
| 2Br-TTM-3PCz | 653         | 657     | 672        |
| 2F-TTM-3PCz  | 617         | 621     | 633        |

2. Figure S1 and table S2: The characteristic bonds and dihedrals for TTM based radicals in cyclohexane solvent.

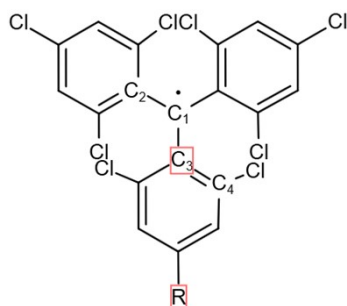

| radicals     | C1-C2 (Å)    | C1-C3 (Å)    | C1-C2-C3-C4  |
|--------------|--------------|--------------|--------------|
| TTM          | 1.475(1.456) | 1.475(1.449) | 131.1(133.7) |
| TTM-IMz      | 1.476(1.449) | 1.461(1.489) | 134.4(121.4) |
| TTM-PCz      | 1.475(1.459) | 1.470(1.450) | 132.2(136.5) |
| TTM-3PCz     | 1.475(1.455) | 1.469(1.463) | 132.7(132.4) |
| TTM-3NCz     | 1.475(1.455) | 1.463(1.461) | 132.7(132.9) |
| 2Br-TTM-3PCz | 1.475(1.453) | 1.469(1.466) | 132.7(131.3) |
| 2F-TTM-PCz   | 1.476(1.459) | 1.470(1.458) | 127.7(133.5) |

()The characteristic bonds and dihedrals of D<sub>1</sub> state.

3. Figure S2: The calculated molecular orbitals of the radicals in the ground state.

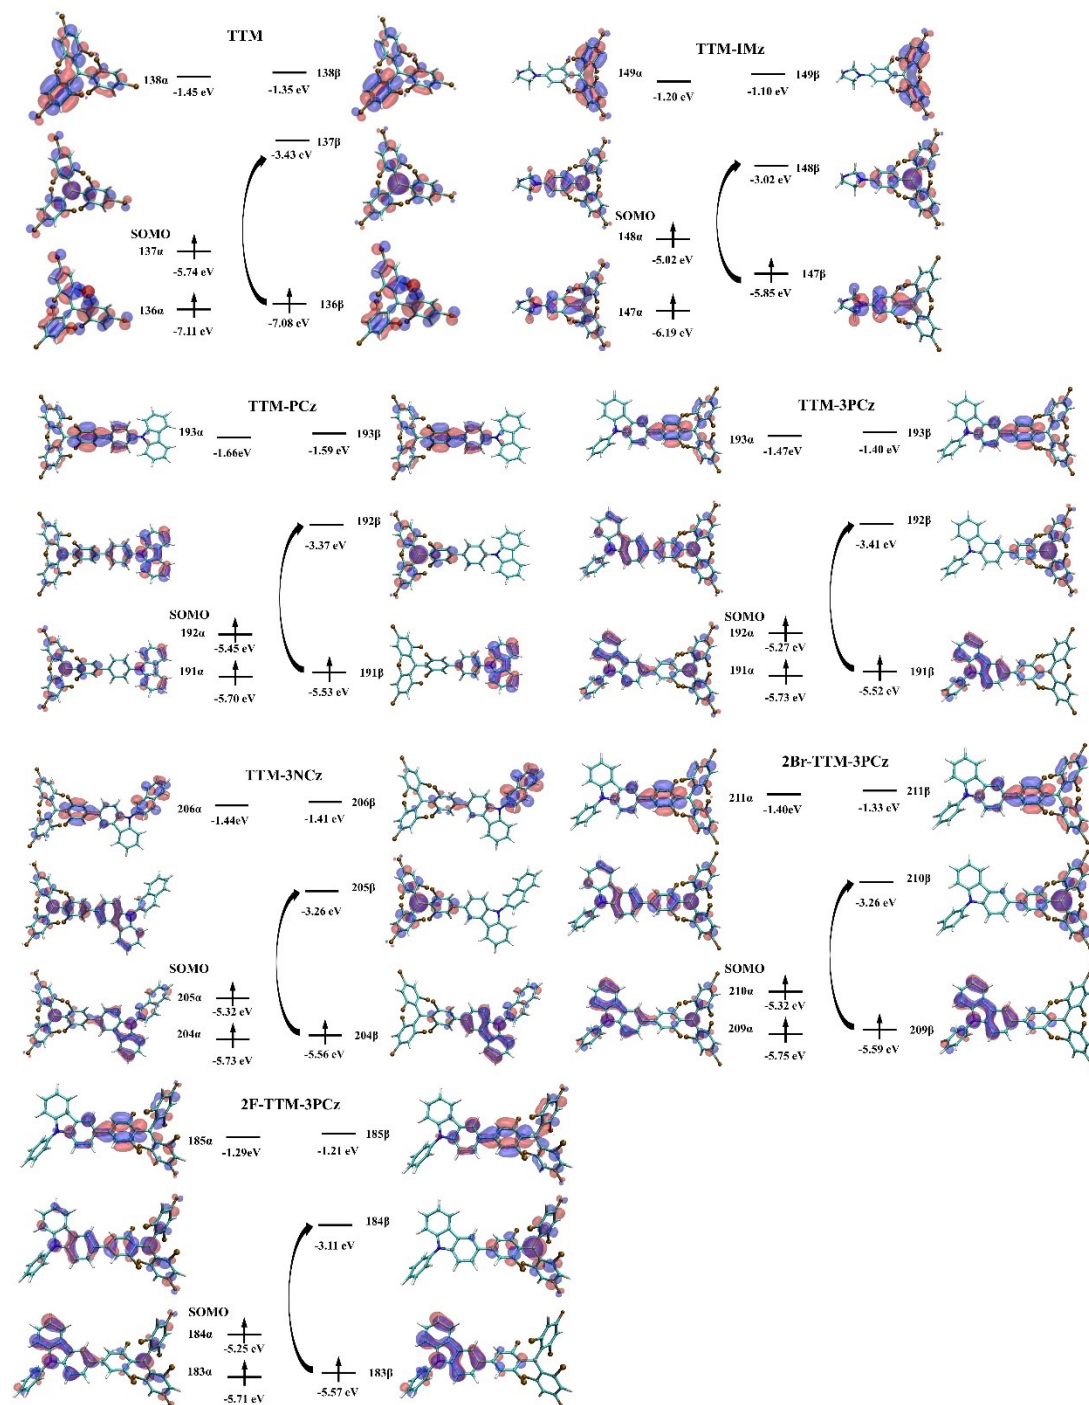

4. Figure S3 the hole-electron overlap for the selected radicals. The overlap is directly related to the value of transition dipole moment.

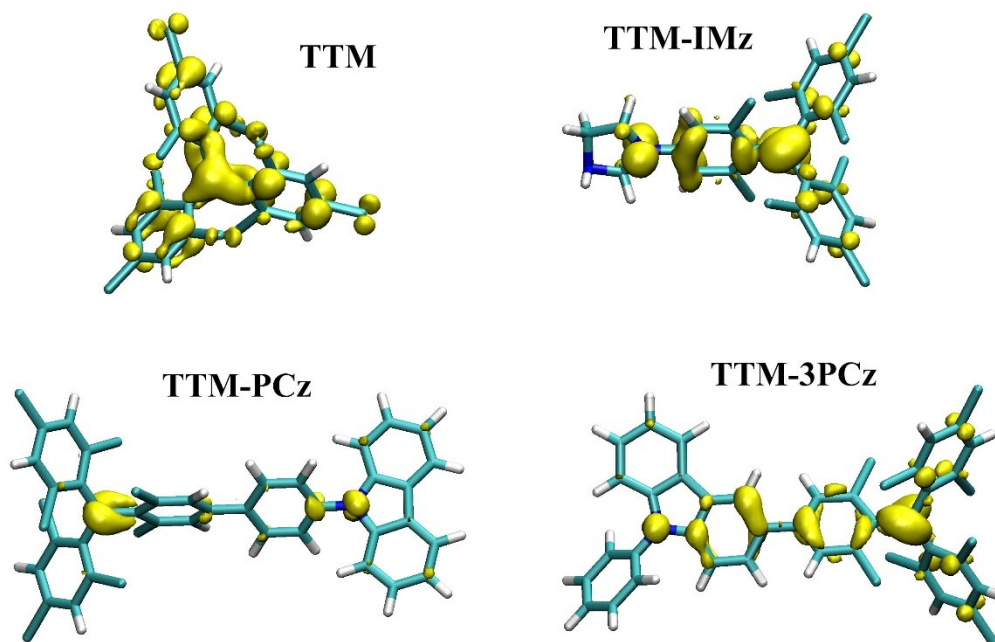

Generalized Mulliken–Hush for obtaining  $H_{ab}$

$$|H_{ab}| = |\mu_{12}| \Delta E_{12} / |\Delta\mu_{ab}| \quad (1)$$

$$|\Delta\mu_{ab}| = [(\mu_{11} - \mu_{22})^2 + 4(\mu_{12})^2]^{1/2} \quad (2)$$

where  $\mu_{12}$  is the transition dipole moment connecting the two adiabatic states in the charge transition,  $\mu_{11}$ - $\mu_{22}$  is the difference of two adiabatic state dipole moments (in this case,  $D_0$  and  $D_1$ ),  $\Delta E_{12}$  is the zero-point energy difference between the initial and final adiabatic states. These values can be extracted from the computing results of geometry optimization results of  $D_0$  and  $D_1$ . (J. Chem. Phys. 106, 9213 (1997); J. AM. CHEM. SOC. 2005, 127, 11303-11310)

5. Table S3 parameters in eq.s(1) and eq.s(2) for obtaining  $H_{ab}$ . Dipole moments (in Debye) and  $\Delta E_{12}$  (in a.u.)

| Solvents | cyclohexane |            |            |                 | Toluene    |            |            |                 | chloroform |            |            |                 |
|----------|-------------|------------|------------|-----------------|------------|------------|------------|-----------------|------------|------------|------------|-----------------|
| Radicals | $\mu_{11}$  | $\mu_{22}$ | $\mu_{12}$ | $\Delta E_{12}$ | $\mu_{11}$ | $\mu_{22}$ | $\mu_{12}$ | $\Delta E_{12}$ | $\mu_{11}$ | $\mu_{22}$ | $\mu_{12}$ | $\Delta E_{12}$ |
| TTM      | 0.001       | 3.57       | 2.19       | 0.087           | 0.00       | 3.70       | 2.26       | 0.087           | 0.00       | 4.11       | 2.50       | 0.087           |
| IMz      | 6.64        | 18.92      | 3.82       | 0.067           | 6.80       | 19.42      | 3.98       | 0.067           | 7.32       | 20.99      | 4.52       | 0.064           |
| PCz      | 1.34        | 43.74      | 3.70       | 0.061           | 1.33       | 43.89      | 3.94       | 0.061           | 1.31       | 44.32      | 4.69       | 0.061           |
| 3PCz     | 6.16        | 34.55      | 5.27       | 0.065           | 6.23       | 35.18      | 5.44       | 0.064           | 6.43       | 37.13      | 6.00       | 0.062           |
| 3NCz     | 6.33        | 37.24      | 5.19       | 0.064           | 6.40       | 37.83      | 5.35       | 0.063           | 6.57       | 39.70      | 5.89       | 0.062           |
| 2Br3PCz  | 5.93        | 34.38      | 5.31       | 0.065           | 6.00       | 35.01      | 5.48       | 0.064           | 6.18       | 36.96      | 6.04       | 0.062           |
| 2F3PCz   | 5.94        | 31.32      | 5.29       | 0.068           | 5.43       | 32.01      | 5.45       | 0.068           | 5.60       | 34.12      | 5.98       | 0.066           |

| Solvents | cyclohexane | Toluene  | chloroform |
|----------|-------------|----------|------------|
| Radicals | $H_{ab}$    | $H_{ab}$ | $H_{ab}$   |
| TTM      | 7402        | 7387     | 7366       |
| IMz      | 3911        | 3901     | 3901       |
| PCz      | 1155        | 1223     | 1426       |
| 3PCz     | 2467        | 2475     | 2499       |
| 3NCz     | 2229        | 2240     | 2274       |
| 2Br3PCz  | 1294        | 1389     | 1638       |
| 2F3PCz   | 1388        | 1486     | 1752       |

6. Table S4 The calculated  $k_r$  and  $k_{nr}$  ( $10^7 \text{ S}^{-1}$ ) of TTM based radicals in toluene.

| Toluene |          |
|---------|----------|
| $k_r$   | $k_{nr}$ |
| 1.11    | 93.4     |
| 1.54    | 598.7    |
| 1.17    | 14.82    |
| 2.57    | 1.52     |
| 2.40    | 4.04     |
| 2.60    | 2.50     |
| 3.09    | 0.16     |

7. Table S5: Considering Huang-Rhys factors (S) of each radical in cyclohexane contributed from different vibrational modes. Where B represents bond length; A represents bond angle; D represents the dihedral.

| Item    | $S^S_{TTM}$ | $S^S_{Sub}$ | $S^B_{TTM}$ | $S^B_{Sub}$ | $S^T_{TTM}$ | $S^T_{Sub}$ | $S_{total}$ |
|---------|-------------|-------------|-------------|-------------|-------------|-------------|-------------|
| TTM     | 0.448       | 0.000       | 1.134       | 0.000       | 8.976       | 0.000       | 10.558      |
| IMz     | 0.504       | 0.009       | 1.180       | 0.014       | 14.951      | 1.721       | 18.379      |
| PCz     | 0.045       | 0.021       | 0.122       | 0.068       | 2.548       | 1.855       | 4.659       |
| 3PCz    | 0.022       | 0.008       | 0.090       | 0.033       | 2.544       | 2.254       | 4.951       |
| 3NCz    | 0.024       | 0.005       | 0.088       | 0.049       | 2.772       | 2.125       | 5.063       |
| 2Br3PCz | 0.015       | 0.004       | 0.066       | 0.032       | 1.383       | 2.122       | 3.622       |
| 2F3PCz  | 0.033       | 0.004       | 0.130       | 0.022       | 2.782       | 2.300       | 5.271       |

8. Atomic coordinates of all the radicals at their ground-state geometry.

TTM

0 2

|   |             |             |             |
|---|-------------|-------------|-------------|
| C | -3.19433386 | -2.74390259 | 0.34410931  |
| C | -2.51718384 | -1.74293908 | 1.29864580  |
| C | -1.70998450 | -0.71971923 | 0.78350280  |
| C | -2.70817669 | -1.85528213 | 2.68241700  |
| C | -1.09377538 | 0.19115561  | 1.65213120  |
| C | -2.09196858 | -0.94440653 | 3.55104532  |
| C | -1.28476585 | 0.07881079  | 3.03590258  |
| H | -0.47745859 | 0.97240505  | 1.25880826  |
| H | -2.23779620 | -1.03018268 | 4.60758531  |
| C | -2.46801661 | -4.04310729 | -0.05102409 |
| C | -2.63663834 | -5.20202686 | 0.71864732  |
| C | -1.63844615 | -4.06646397 | -1.18026688 |
| C | -1.97568745 | -6.38430240 | 0.35907752  |
| C | -0.97749328 | -5.24873884 | -1.53983525 |
| C | -1.14611318 | -6.40765780 | -0.77016250 |
| H | -2.10443509 | -7.26916362 | 0.94673784  |
| H | -0.34409634 | -5.26657168 | -2.40203609 |
| C | -4.59780114 | -2.44566141 | -0.21529376 |
| C | -4.73728266 | -1.74218023 | -1.41927927 |
| C | -5.73547484 | -2.87774312 | 0.47963494  |
| C | -6.01443786 | -1.47078148 | -1.92833649 |

|    |             |             |             |
|----|-------------|-------------|-------------|
| C  | -7.01262998 | -2.60634772 | -0.02942425 |
| C  | -7.15211148 | -1.90286718 | -1.23341013 |
| H  | -6.12093513 | -0.93365658 | -2.84760532 |
| H  | -7.88126906 | -2.93625323 | 0.50116834  |
| Cl | -0.31603178 | -7.89246163 | -1.22174023 |
| Cl | -1.42668123 | -2.61099363 | -2.14689076 |
| Cl | -3.67848718 | -5.17269422 | 2.13684709  |
| Cl | -8.75607397 | -1.56202529 | -1.87273097 |
| Cl | -3.30849319 | -1.19952923 | -2.29202811 |
| Cl | -5.56030184 | -3.76123536 | 1.99170501  |
| Cl | -0.51087270 | 1.22276352  | 4.12680199  |
| Cl | -1.47012054 | -0.57862796 | -0.95435754 |
| Cl | -3.72193020 | -3.14032883 | 3.32937819  |

TTM-IMz

0 2

|   |             |             |             |
|---|-------------|-------------|-------------|
| C | 0.07054079  | 0.46818084  | -0.08665929 |
| C | 0.15633989  | 1.22917982  | -1.42274276 |
| C | -1.01478170 | 1.66307782  | -2.05845396 |
| C | 1.40553864  | 1.48779091  | -2.00286752 |
| C | -0.93670439 | 2.35558924  | -3.27428858 |
| C | 1.48361583  | 2.18030019  | -3.21870337 |
| C | 0.31249439  | 2.61420061  | -3.85441318 |
| H | -1.83088168 | 2.68688035  | -3.75966798 |
| H | 2.43740664  | 2.37775288  | -3.66164301 |
| C | 0.09610738  | 1.24313992  | 1.24389878  |
| C | 1.31790036  | 1.50810281  | 1.87709586  |
| C | -1.10241998 | 1.68338982  | 1.82150952  |
| C | 1.34116614  | 2.21331736  | 3.08790266  |
| C | -1.07915411 | 2.38860535  | 3.03231575  |
| C | 0.14263904  | 2.65357014  | 3.66551172  |
| H | 2.27403227  | 2.41562314  | 3.57136224  |
| H | -1.99425641 | 2.72474510  | 3.47333486  |
| C | -0.04082475 | -1.06777723 | -0.08113389 |
| C | -1.30165621 | -1.67899479 | -0.10641361 |
| C | 1.11866413  | -1.85428151 | -0.05082693 |
| C | -1.40299872 | -3.07671667 | -0.10138951 |
| C | 1.01732160  | -3.25200338 | -0.04580215 |
| C | -0.24350984 | -3.86322095 | -0.07108244 |



|    |             |             |             |
|----|-------------|-------------|-------------|
| H  | 1.90261706  | -3.85251685 | -0.02266099 |
| Cl | 0.41055067  | 3.48391684  | -5.38136395 |
| Cl | -2.58363434 | 1.33828820  | -1.32988474 |
| Cl | 2.87633478  | 0.94286081  | -1.20448798 |
| Cl | -0.37078453 | -5.61860165 | -0.06477391 |
| Cl | 2.70212579  | -1.08666129 | -0.01907275 |
| Cl | 2.82311482  | 0.95519375  | 1.15168494  |
| Cl | -2.63685426 | 1.35062192  | 1.02628816  |
| C  | -0.76007124 | 3.87847208  | 6.04754526  |
| C  | 0.98292520  | 4.58193027  | 4.45868641  |
| C  | 0.75883334  | 5.71975653  | 5.44444704  |
| H  | 0.11140008  | 5.27414175  | 7.47879818  |
| H  | -1.84209160 | 3.88856267  | 5.76141443  |
| H  | -0.65447168 | 3.17387776  | 6.91000736  |
| H  | 2.05771518  | 4.27117132  | 4.45536621  |
| H  | 0.73267513  | 4.91254206  | 3.41923277  |
| H  | 1.71106383  | 5.97022626  | 5.97615669  |
| H  | 0.43011089  | 6.64393789  | 4.90606393  |
| N  | 0.09298498  | 3.41917307  | 4.87391811  |
| N  | -0.30413451 | 5.27646513  | 6.43970455  |
| H  | -2.36567143 | -3.54339487 | -0.12069528 |
| Cl | -2.75784318 | -0.69123432 | -0.14447619 |

TTM-PCz

0 2

|   |             |             |             |
|---|-------------|-------------|-------------|
| C | -2.13095193 | 0.22840019  | -0.39252150 |
| C | -3.64079015 | -0.02078421 | -0.27769162 |
| C | -4.09244723 | -1.32919087 | -0.05539514 |
| C | -4.55100243 | 1.03366735  | -0.36522302 |
| C | -5.45622908 | -1.58032513 | 0.09722028  |
| C | -5.91859145 | 0.78553344  | -0.20723042 |
| C | -6.37125279 | -0.52239825 | 0.02352775  |
| H | -5.79569451 | -2.58198982 | 0.27027058  |
| H | -6.61559117 | 1.59555171  | -0.26210700 |
| C | -1.43698544 | 0.61247541  | 0.91390918  |
| C | -1.12011241 | 1.94618936  | 1.18563123  |
| C | -1.15774816 | -0.39046076 | 1.84677940  |
| C | -0.61947875 | 2.29613463  | 2.44327269  |
| C | -0.69049807 | -0.03982666 | 3.11931766  |
| C | -0.43883148 | 1.31100132  | 3.42111973  |
| H | -0.37893857 | 3.31578616  | 2.65949825  |
| H | -0.53086586 | -0.79643084 | 3.85896965  |

|    |             |             |             |
|----|-------------|-------------|-------------|
| C  | -1.40152994 | 0.07875441  | -1.74502164 |
| C  | -0.90630121 | -1.17236951 | -2.14059027 |
| C  | -1.24722985 | 1.18855032  | -2.58748165 |
| C  | -0.30021213 | -1.32309462 | -3.39473525 |
| C  | -0.63838754 | 1.04280251  | -3.84097685 |
| C  | -0.17749184 | -0.21663340 | -4.24930766 |
| H  | 0.06588705  | -2.28360553 | -3.70404098 |
| H  | -0.52873103 | 1.89130820  | -4.48912293 |
| Cl | -8.09137187 | -0.83705850 | 0.22322161  |
| Cl | -2.93003725 | -2.65245836 | 0.03415635  |
| Cl | -3.96957459 | 2.66957028  | -0.66387710 |
| Cl | 0.55175751  | -0.41277427 | -5.83834354 |
| Cl | -1.82630364 | 2.76717537  | -2.07125739 |
| Cl | -1.05740168 | -2.55457136 | -1.06215946 |
| Cl | -1.41911865 | -2.07684675 | 1.41491790  |
| Cl | -1.35431903 | 3.18395985  | -0.04403037 |
| C  | 0.03567205  | 1.72769881  | 4.82682498  |
| C  | -0.01233277 | 0.81582582  | 5.89972714  |
| C  | 0.51373959  | 3.03275528  | 5.03081245  |
| C  | 0.39313739  | 1.22485212  | 7.17445799  |
| H  | -0.35939959 | -0.18517641 | 5.74885502  |
| C  | 0.97437019  | 3.41783576  | 6.29522781  |
| H  | 0.53324496  | 3.73615145  | 4.21691747  |
| C  | 0.90427313  | 2.51163791  | 7.36505885  |
| H  | 0.31985809  | 0.55032551  | 8.00397032  |
| H  | 1.37631238  | 4.39980430  | 6.44649943  |
| C  | 2.56750785  | -0.00269210 | 11.48864855 |
| C  | 1.38333353  | -0.25925574 | 10.75231002 |
| C  | 0.95380920  | 0.65757309  | 9.77229263  |
| C  | 1.69064552  | 1.76593121  | 9.58235667  |
| C  | 2.88472874  | 1.96039526  | 10.23596985 |
| C  | 3.33164371  | 1.14617162  | 11.20580649 |
| H  | 2.87768188  | -0.67652574 | 12.25936925 |
| H  | 0.81255810  | -1.14567189 | 10.93905136 |
| H  | 0.06168027  | 0.48925811  | 9.20328324  |
| H  | 4.23435286  | 1.35673539  | 11.73699670 |
| C  | 2.66603070  | 3.64847736  | 8.64260288  |
| C  | 3.03086082  | 4.63148329  | 7.78924664  |
| C  | 4.29182022  | 5.24073391  | 7.98220436  |
| C  | 5.12697521  | 4.82384128  | 9.05313609  |
| C  | 4.71191618  | 3.76629321  | 9.89160616  |
| C  | 3.52672397  | 3.18952229  | 9.62221816  |
| H  | 2.38256278  | 4.94904571  | 6.99579248  |
| H  | 4.61830044  | 6.01759710  | 7.32248949  |

|   |            |            |             |
|---|------------|------------|-------------|
| H | 6.06562586 | 5.30536674 | 9.22325970  |
| H | 5.32172038 | 3.42980161 | 10.70422925 |
| N | 1.37488666 | 2.91102379 | 8.69274274  |

TTM-3PCz

0 2

|    |             |             |              |
|----|-------------|-------------|--------------|
| C  | 5.37782309  | -1.46427514 | -6.03441271  |
| C  | 5.92889513  | -0.33581239 | -6.92314492  |
| C  | 6.50529192  | 0.80285282  | -6.34500547  |
| C  | 5.85644599  | -0.45354317 | -8.31755758  |
| C  | 7.02359403  | 1.81718559  | -7.16325527  |
| C  | 6.37446074  | 0.55935233  | -9.13530867  |
| C  | 6.96166417  | 1.69321109  | -8.55827257  |
| H  | 7.46754315  | 2.68552133  | -6.72340572  |
| H  | 6.32279190  | 0.46655299  | -10.20014305 |
| C  | 3.91210427  | -1.44515193 | -5.56141275  |
| C  | 2.90820531  | -1.98597684 | -6.37505408  |
| C  | 3.58176214  | -0.88970891 | -4.31688449  |
| C  | 1.57569369  | -1.98328723 | -5.94031874  |
| C  | 2.25085405  | -0.90710032 | -3.87141781  |
| C  | 1.24916240  | -1.46039358 | -4.68080700  |
| H  | 0.80781934  | -2.38466836 | -6.56865411  |
| H  | 1.99971302  | -0.49870736 | -2.91469331  |
| C  | 6.30096013  | -2.62418393 | -5.61672428  |
| C  | 7.05042319  | -2.52652233 | -4.43733847  |
| C  | 6.39209273  | -3.77356408 | -6.41184201  |
| C  | 7.88767409  | -3.58048240 | -4.04935005  |
| C  | 7.22937874  | -4.82829263 | -6.02357910  |
| C  | 7.97570342  | -4.73207159 | -4.84152766  |
| H  | 8.45960190  | -3.50596117 | -3.14819863  |
| H  | 7.29871875  | -5.70724203 | -6.62954895  |
| Cl | 7.62245030  | 2.96109297  | -9.58602577  |
| Cl | 6.58062388  | 0.95926392  | -4.59390553  |
| Cl | 5.11639660  | -1.87648978 | -9.04121914  |
| Cl | 9.02437826  | -6.05767340 | -4.35229129  |
| Cl | 6.93897485  | -1.07778314 | -3.44359154  |
| Cl | 5.45496022  | -3.89163966 | -7.89692596  |
| Cl | 4.83938267  | -0.17721085 | -3.31310354  |
| Cl | 3.32009957  | -2.67045128 | -7.94308399  |
| C  | -5.19820847 | -3.64370315 | -6.68290112  |
| C  | -6.21780664 | -3.58406527 | -5.69938195  |
| C  | -5.97171207 | -2.94599348 | -4.46523153  |
| C  | -4.75326949 | -2.40144375 | -4.26789055  |

|   |             |             |             |
|---|-------------|-------------|-------------|
| C | -3.74263726 | -2.54811933 | -5.19413645 |
| C | -3.92594709 | -3.10971045 | -6.40356267 |
| H | -5.39380264 | -4.09604414 | -7.63277792 |
| H | -7.17541517 | -4.02038515 | -5.89433655 |
| H | -6.72988229 | -2.89015762 | -3.71310178 |
| H | -3.13368302 | -3.15463111 | -7.12210238 |
| C | -2.81655279 | -1.54098308 | -3.30639209 |
| C | -1.87833695 | -1.11148753 | -2.43725596 |
| C | -0.53775633 | -1.07263930 | -2.87787532 |
| C | -0.20988044 | -1.50032337 | -4.18981265 |
| C | -1.22398944 | -1.97311724 | -5.04345580 |
| C | -2.47766356 | -2.00438758 | -4.55995401 |
| H | -2.14360205 | -0.80151499 | -1.44754025 |
| H | 0.23049594  | -0.72158948 | -2.22151012 |
| H | -1.00462035 | -2.30235200 | -6.03688957 |
| C | -5.86148402 | -2.91004700 | -1.69978262 |
| C | -6.22398748 | -3.47704991 | -0.47034380 |
| C | -5.40224792 | -3.30707369 | 0.65218812  |
| C | -4.21876686 | -2.56511698 | 0.54566503  |
| C | -3.85419676 | -1.99925142 | -0.68471892 |
| C | -4.67441961 | -2.17557492 | -1.80886756 |
| H | -6.49139914 | -3.03922545 | -2.55564184 |
| H | -7.12896824 | -4.04128257 | -0.38919201 |
| H | -5.67861919 | -3.74347299 | 1.59001205  |
| H | -3.59366724 | -2.43043782 | 1.40277747  |
| H | -2.94941726 | -1.43412715 | -0.76565872 |
| N | -4.29055213 | -1.59488893 | -3.10393189 |

TTM-3NCz

02

|   |            |             |             |
|---|------------|-------------|-------------|
| C | 3.06082642 | -0.02786672 | -0.31490466 |
| C | 3.80593875 | 0.42396098  | 0.95440651  |
| C | 3.11851871 | 0.96342067  | 2.05381619  |
| C | 5.19969655 | 0.28547711  | 1.00162224  |
| C | 3.83241493 | 1.35716975  | 3.19676274  |
| C | 5.91025551 | 0.68037284  | 2.13877172  |
| C | 5.22793214 | 1.21697414  | 3.23712022  |
| H | 3.31276257 | 1.76674937  | 4.03813591  |
| H | 6.97473435 | 0.57380331  | 2.16775078  |
| C | 2.82004225 | 0.93451054  | -1.49231766 |
| C | 3.85870621 | 1.22552546  | -2.39550815 |
| C | 1.55563032 | 1.50712989  | -1.67151241 |
| C | 3.61287640 | 2.05458651  | -3.50358513 |

|    |             |             |              |
|----|-------------|-------------|--------------|
| C  | 1.30493283  | 2.29262820  | -2.79207776  |
| C  | 2.31891077  | 2.54229759  | -3.72067439  |
| H  | 4.40494941  | 2.30195923  | -4.18188764  |
| H  | 0.33122586  | 2.70793831  | -2.94295257  |
| C  | 2.54157368  | -1.46825067 | -0.43666084  |
| C  | 1.26381803  | -1.78746763 | 0.04716637   |
| C  | 3.33298866  | -2.45609909 | -1.03143378  |
| C  | 0.77277893  | -3.09236457 | -0.08022799  |
| C  | 2.84047717  | -3.76088152 | -1.16205891  |
| C  | 1.55819232  | -4.07787441 | -0.69159708  |
| H  | -0.20272866 | -3.33625454 | 0.28824196   |
| H  | 3.44175538  | -4.51527815 | -1.62282605  |
| Cl | 6.12526599  | 1.71442011  | 4.66687614   |
| Cl | 6.05897731  | -0.38836043 | -0.37692741  |
| Cl | 1.36907229  | 1.14692063  | 2.00803544   |
| Cl | 0.93433372  | -5.71357716 | -0.86782450  |
| Cl | 0.27482624  | -0.54999436 | 0.81621518   |
| Cl | 4.94391643  | -2.05817578 | -1.61612310  |
| Cl | 5.46382718  | 0.55142859  | -2.13894508  |
| Cl | 0.27372928  | 1.22554615  | -0.50257260  |
| C  | 5.10597058  | 6.63760538  | -8.80562586  |
| C  | 4.18091356  | 7.27602565  | -9.66897292  |
| C  | 2.81188755  | 6.91400706  | -9.63784620  |
| C  | 2.42849812  | 5.96438938  | -8.75478334  |
| C  | 3.33267385  | 5.42653017  | -7.85578030  |
| C  | 4.64981320  | 5.68313800  | -7.88237251  |
| H  | 6.14778721  | 6.88044848  | -8.85358823  |
| H  | 4.52193864  | 8.03144336  | -10.34688375 |
| H  | 2.10736712  | 7.37372768  | -10.29858715 |
| H  | 5.32533331  | 5.18581921  | -7.21669223  |
| C  | 1.22258957  | 4.68463977  | -7.24846793  |
| C  | 0.23929650  | 4.23797863  | -6.45418939  |
| C  | 0.60511222  | 3.58056821  | -5.26816436  |
| C  | 1.96849428  | 3.35329846  | -4.97369016  |
| C  | 2.96635876  | 3.86390624  | -5.82379218  |
| C  | 2.54649037  | 4.57945042  | -6.88393887  |
| H  | -0.78906028 | 4.37452968  | -6.71847174  |
| H  | -0.14801283 | 3.24335126  | -4.59133319  |
| H  | 4.00871457  | 3.70414003  | -5.63197894  |
| N  | 1.08103780  | 5.33950181  | -8.57307759  |
| C  | -0.07184138 | 6.25803643  | -8.61539103  |
| C  | -1.30676061 | 5.76234857  | -9.06388066  |
| C  | -2.43655628 | 6.58591981  | -9.08552584  |
| C  | -2.34088205 | 7.91424458  | -8.65507647  |

|   |             |            |             |
|---|-------------|------------|-------------|
| C | -1.10296347 | 8.42340927 | -8.22663990 |
| C | 0.03547025  | 7.59498315 | -8.20901687 |
| H | -3.73483751 | 5.05987966 | -9.86202789 |
| H | -1.38414219 | 4.74677935 | -9.39056161 |
| C | -3.66296171 | 6.07825222 | -9.53563674 |
| C | -3.48227692 | 8.73183715 | -8.65266271 |
| H | -1.02739082 | 9.44283278 | -7.91425412 |
| H | 0.97632010  | 7.98050969 | -7.88440812 |
| C | -4.70638958 | 8.22848604 | -9.11743229 |
| C | -4.79578335 | 6.90325961 | -9.55794363 |
| H | -3.41819136 | 9.73906730 | -8.29739936 |
| H | -5.57406676 | 8.85697774 | -9.13435432 |
| H | -5.72787374 | 6.51855072 | -9.91195981 |

2Br-TTM-3PCz

0 2

|    |             |             |             |
|----|-------------|-------------|-------------|
| C  | 2.47431300  | -0.05192200 | 0.00590700  |
| C  | 3.18130900  | 1.24125800  | 0.06992500  |
| C  | 2.86392000  | 2.24003000  | 1.02726300  |
| C  | 4.23409600  | 1.58632200  | -0.81678300 |
| C  | 3.52050100  | 3.46444700  | 1.10004300  |
| C  | 4.91186600  | 2.80012700  | -0.76374500 |
| C  | 4.54451700  | 3.73286300  | 0.19914400  |
| H  | 3.24585200  | 4.18327000  | 1.86149100  |
| H  | 5.69751200  | 3.01514900  | -1.47681800 |
| C  | 1.00542000  | -0.08994000 | 0.00749100  |
| C  | 0.20761100  | 0.74139200  | -0.82370100 |
| C  | 0.25330400  | -0.96046600 | 0.84074400  |
| C  | -1.17906400 | 0.71202300  | -0.82739200 |
| C  | -1.13329500 | -0.99980000 | 0.85023600  |
| C  | -1.88581100 | -0.16096400 | 0.01397300  |
| H  | -1.71186000 | 1.34361700  | -1.52832100 |
| H  | -1.63075400 | -1.65795500 | 1.55266600  |
| C  | 3.24801400  | -1.30620300 | -0.05938600 |
| C  | 4.31903800  | -1.59545900 | 0.82542600  |
| C  | 2.98207700  | -2.32009100 | -1.01650600 |
| C  | 5.05992500  | -2.77171000 | 0.77066700  |
| C  | 3.70231300  | -3.50808900 | -1.09097000 |
| C  | 4.74076000  | -3.72219400 | -0.19203900 |
| H  | 5.85715100  | -2.94518000 | 1.48220000  |
| H  | 3.46468700  | -4.24020600 | -1.85221600 |
| Cl | 1.65791900  | 1.95470500  | 2.27045000  |
| Cl | 4.69851000  | 0.51843100  | -2.13061200 |

|    |              |             |             |
|----|--------------|-------------|-------------|
| Cl | 4.72862200   | -0.50492300 | 2.13893400  |
| Cl | 1.76034500   | -2.09835000 | -2.25728700 |
| Cl | 1.05185700   | -1.98525000 | 2.02899800  |
| Cl | 0.94983100   | 1.80276100  | -2.01632000 |
| C  | -7.72115400  | 3.98875100  | -0.73955900 |
| C  | -8.94496800  | 3.31002000  | -0.60039400 |
| C  | -8.99292300  | 1.93997600  | -0.35010800 |
| C  | -7.77796300  | 1.25724800  | -0.24508100 |
| C  | -6.53465000  | 1.92764200  | -0.37150100 |
| C  | -6.51423400  | 3.30483000  | -0.62370900 |
| H  | -7.71974700  | 5.05699600  | -0.93569300 |
| H  | -9.87581400  | 3.86362200  | -0.68723000 |
| H  | -9.94094700  | 1.42474400  | -0.23745600 |
| H  | -5.56934500  | 3.83242000  | -0.72315700 |
| C  | -6.16331000  | -0.30320100 | 0.06014500  |
| C  | -5.44136500  | -1.48309600 | 0.26612200  |
| C  | -4.05404700  | -1.40999600 | 0.24765800  |
| C  | -3.36488600  | -0.19371500 | 0.02064100  |
| C  | -4.10728500  | 0.97562900  | -0.19871900 |
| C  | -5.50198300  | 0.92952800  | -0.18159700 |
| H  | -5.94319200  | -2.43163700 | 0.42450500  |
| H  | -3.48381100  | -2.32439200 | 0.38019200  |
| H  | -3.59917300  | 1.92288300  | -0.35492700 |
| C  | -9.49004200  | -1.33792900 | -0.78654200 |
| C  | -10.47085600 | -2.31016800 | -0.58900400 |
| C  | -10.49596300 | -3.05627300 | 0.59145600  |
| C  | -9.53981400  | -2.81983000 | 1.58163400  |
| C  | -8.56711400  | -1.83619700 | 1.40037100  |
| C  | -8.53833300  | -1.09661600 | 0.21178200  |
| H  | -9.45072000  | -0.77154800 | -1.71178600 |
| H  | -11.20822700 | -2.49220400 | -1.36568200 |
| H  | -11.25648800 | -3.81761300 | 0.73892700  |
| H  | -9.55653100  | -3.39252100 | 2.50457500  |
| H  | -7.83675600  | -1.63077000 | 2.17682900  |
| N  | -7.54075100  | -0.09839600 | 0.01757600  |
| Br | 5.74069100   | -5.34066400 | -0.28059500 |
| Br | 5.45712300   | 5.40224600  | 0.28530300  |

2F-TTM-3PCz

0 2

|   |            |             |            |
|---|------------|-------------|------------|
| C | 3.28264800 | -0.05950800 | 0.00224700 |
| C | 3.99585100 | 1.22370100  | 0.15309400 |
| C | 3.68748100 | 2.15344600  | 1.18132900 |

|    |             |             |             |
|----|-------------|-------------|-------------|
| C  | 5.04677000  | 1.62561500  | -0.71274100 |
| C  | 4.34860500  | 3.36671800  | 1.33884200  |
| C  | 5.73277800  | 2.82768700  | -0.57737600 |
| C  | 5.36666100  | 3.68187700  | 0.45171000  |
| H  | 4.09513200  | 4.04315700  | 2.14561700  |
| H  | 6.51851000  | 3.10638200  | -1.26851100 |
| C  | 1.81336000  | -0.09108000 | 0.00250300  |
| C  | 1.01786500  | 0.79757900  | -0.76954200 |
| C  | 1.05692200  | -1.01258100 | 0.77491700  |
| C  | -0.36907500 | 0.77399300  | -0.77510600 |
| C  | -0.32996500 | -1.04724000 | 0.78223500  |
| C  | -1.07944700 | -0.15122800 | 0.00489300  |
| H  | -0.89910800 | 1.45411500  | -1.43134000 |
| H  | -0.82969300 | -1.74968400 | 1.43869100  |
| C  | 4.05077400  | -1.31061300 | -0.14855200 |
| C  | 5.11778300  | -1.66683600 | 0.71762500  |
| C  | 3.78336700  | -2.25255800 | -1.17713000 |
| C  | 5.85536900  | -2.83795200 | 0.58218000  |
| C  | 4.49663600  | -3.43591800 | -1.33477900 |
| C  | 5.52709600  | -3.70685900 | -0.44735500 |
| H  | 6.65216800  | -3.08251300 | 1.27356200  |
| H  | 4.27304200  | -4.12244800 | -2.14187300 |
| Cl | 2.48385400  | 1.78471800  | 2.40472800  |
| Cl | 5.49871200  | 0.65039800  | -2.10094100 |
| Cl | 5.52626500  | -0.67338100 | 2.10637500  |
| Cl | 2.56509900  | -1.93608600 | -2.40064700 |
| Cl | 1.85011200  | -2.11992800 | 1.89145600  |
| Cl | 1.76283800  | 1.93631000  | -1.88767000 |
| C  | -6.90026000 | 4.05811100  | -0.48686100 |
| C  | -8.12661600 | 3.37655000  | -0.39052900 |
| C  | -8.17969700 | 1.99373300  | -0.22626100 |
| C  | -6.96734400 | 1.30111900  | -0.16415400 |
| C  | -5.72149600 | 1.97359100  | -0.24813700 |
| C  | -5.69593000 | 3.36375500  | -0.41372500 |
| H  | -6.89481900 | 5.13650300  | -0.61601700 |
| H  | -9.05540400 | 3.93791800  | -0.44275900 |
| H  | -9.12968300 | 1.47605100  | -0.14605000 |
| H  | -4.74900500 | 3.89292800  | -0.47989300 |
| C  | -5.35813000 | -0.28119600 | 0.04195300  |
| C  | -4.64025300 | -1.47421600 | 0.17208800  |
| C  | -3.25261400 | -1.40486100 | 0.15762800  |
| C  | -2.55895700 | -0.17907100 | 0.00926700  |
| C  | -3.29748500 | 1.00423500  | -0.13484700 |
| C  | -4.69244600 | 0.96184800  | -0.12128400 |



|   |              |             |             |
|---|--------------|-------------|-------------|
| H | -5.14530900  | -2.42922400 | 0.26973000  |
| H | -2.68563900  | -2.32789400 | 0.23100400  |
| H | -2.78628500  | 1.95785800  | -0.23024900 |
| C | -8.69153100  | -1.24827400 | -0.86245000 |
| C | -9.67549200  | -2.22747800 | -0.72360100 |
| C | -9.70010300  | -3.04662900 | 0.40739500  |
| C | -8.74027500  | -2.87658700 | 1.40760500  |
| C | -7.76442000  | -1.88698000 | 1.28579000  |
| C | -7.73604700  | -1.07383100 | 0.14619000  |
| H | -8.65271100  | -0.62495500 | -1.75035400 |
| H | -10.41573200 | -2.35750800 | -1.50797100 |
| H | -10.46306300 | -3.81305000 | 0.50881200  |
| H | -8.75650700  | -3.50630500 | 2.29263800  |
| H | -7.03109100  | -1.73364800 | 2.07142500  |
| N | -6.73513500  | -0.06916200 | 0.01268300  |
| F | 6.22803400   | -4.84466700 | -0.58915300 |
| F | 6.01750900   | 4.84906000  | 0.59340600  |
